# Supplementary material for: Inhibitory Effect of Centella asiatica Extract on DNCB-Induced Atopic Dermatitis in HaCaT Cells and BALB/c Mice
Source: PubMed Central journal article supplement (PMC7071208; doi:10.3390/nu12020411), 2020-02-05
Supplement: nutrients-12-00411-s001.pdf [file nutrients-12-00411-s001.pdf]

## SUPPLEMENTARY FILE

**Table 1.** List of primers for real-time PCR.

| <b>Name</b>   | <b>Forward</b>                  | <b>Revers</b>                    |
|---------------|---------------------------------|----------------------------------|
| GAPDH         | 5'-CATGGCCTTCCGTGTTTCCTA-3'     | 5'-TGTCATCATACTTGGCAGGTTTCT-3'   |
| TNF- $\alpha$ | 5'-AAGCCTGTAGCCCACGTCGTA-3'     | 5'-GGCACCCTAGTTGGTTGTCTTTG-3'    |
| IL-4          | 5'-TCTCGAATGTACCAGGAGCCATATC-3' | 5'-AGCACCTTGGGAAGCCCTACAGA-3'    |
| IL-5          | 5'-ACAGGAGAAGGGACGCCAT-3'       | 5'-GAAGCCGTACAGACGAGCTCA-3'      |
| IL-17         | 5'-TCCCCTCTGTCATCTGGGAAG-3'     | 5'-CTCGACCCTGAAAGTGAAGG-3'       |
| IL-6          | 5'-CCACTCACAAGTCGGAGGCTTA-3'    | 5'-GCAAGTGCATCATCGTTGTTTCATAC-3' |
| IL-10         | 5'-TCAGCTGTGTCTGGGCCACT-3'      | 5'-TTATGAGTAGGGACAGGAAGCCTCA-3'  |
| iNOS          | 5'-GGAATGGAGACTGTCCCAGCA-3'     | 5'-GTCATGAGCAAAGGCGCAGA-3'       |
| COX-2         | 5'-GCCAGGCTGAACTTCGAAACA-3'     | 5'-GCTCACGAGGCCACTGATACCTA-3'    |
| CXCL9         | 5'-GGAACCCTAGTGATAAGGAATGCA-3'  | 5'-TGTCATCATACTTGGCAGGTTTCT-3'   |
